# Supplementary material for: A ratiometric fluorescent sensor for Ag+ based on 8-hydroxyquinoline platform in aqueous media
Source: Royal Society of Chemistry journal article supplement (doi:10.1039/c3ay40277k), 2013-01-01
Supplement: c3ay40277k.pdf [file c3ay40277k.pdf]

## Supplementary Data for

# A ratiometric fluorescent sensor for Ag<sup>+</sup> based on 8-hydroxyquinoline Platform in aqueous media

Huajie Xu,<sup>a</sup> Zhaodi Liu,<sup>\*a</sup> Liangquan Sheng,<sup>a</sup> Deqian Huang,<sup>a</sup> Hong Zhang,<sup>a</sup> Chongfu Song,<sup>a</sup>  
Mingming Chen,<sup>a,b</sup> and Wuyang Hua<sup>a</sup>

<sup>a</sup>*Department of Chemistry, Fuyang Normal College, Fuyang, China. Fax:(+86-558-2593836); Tel: (+86-558-2593836); E-mail: zhaodi\_liu@163.com.*

<sup>b</sup>*Department of Chemistry, Anhui University, Hefei, China.*

S1

### 1. Materials and instruments

All the materials and solvents were purchased from commercial suppliers and used without further purification. The solution of metal ions were prepared from chloride salts of Ni<sup>2+</sup>, Fe<sup>3+</sup>, Cu<sup>2+</sup>, Mn<sup>2+</sup>, Hg<sup>2+</sup>, Na<sup>+</sup>, Ca<sup>2+</sup>, Zn<sup>2+</sup>, Mg<sup>2+</sup>, Pb<sup>2+</sup>, K<sup>+</sup>, Co<sup>2+</sup>, Li<sup>+</sup>, Cd<sup>2+</sup>, Cr<sup>3+</sup>, Al<sup>3+</sup>, Sr<sup>2+</sup>, Ba<sup>2+</sup>, and nitrate salts of Ag<sup>+</sup>. Stock solutions of metal ions (20 mM) were prepared in deionized water.

A stock solution of **L** (200 μM) was prepared in CH<sub>3</sub>CN. In selectivity experiments, the test samples were prepared by appropriate amount of metal ion stock into 3 ml solution of **L** (100 μM). Fluorescence spectra measurements were performed on a Cary Eclipse fluorescence spectrophotometer. <sup>1</sup>H NMR spectra were recorded on a Varian INOVA-400 MHz spectrometer with tetramethylsilane (TMS) as internal standard.

### 2. Synthesis and characterization of **L**

A solution of 8-Hydroxyquinoline-2-carboxaldehyde (0.34 g, 2 mmol) and 4 1-Aminohydantoin hydrochloride (0.30 g, 2 mmol) in 20 mL ethanol was stirred at 50 °C for 2 h. After completion of the reaction, the obtained yellow precipitate was filtered and washed several times with cold ethanol. After drying under reduced pressure, the reaction afforded 0.52 g (82%) as a yellow solid. <sup>1</sup>H NMR (400 MHz, *d*<sub>6</sub>-DMSO) δ: 11.57 (s, 1H), 10.55 (s, 1H), 8.46 (d, *J* = 8.4 Hz, 1H), 8.06 (s, 1H), 7.97 (d, *J* = 8.4 Hz, 1H), 7.45-7.52 (m, 2H), 7.20 (d, *J* = 7.2 Hz, 1H), 4.52

(s, 2H).  $^{13}\text{C}$  NMR (100 MHz,  $\text{d}_6\text{-DMSO}$ )  $\delta$  168.64, 153.24, 151.70, 150.29, 139.86, 139.64, 134.44, 129.06, 128.89, 117.99, 117.55, 113.77, 48.85. ESI-MS:  $([\text{M} + \text{H}]^+)$ , 272.208.

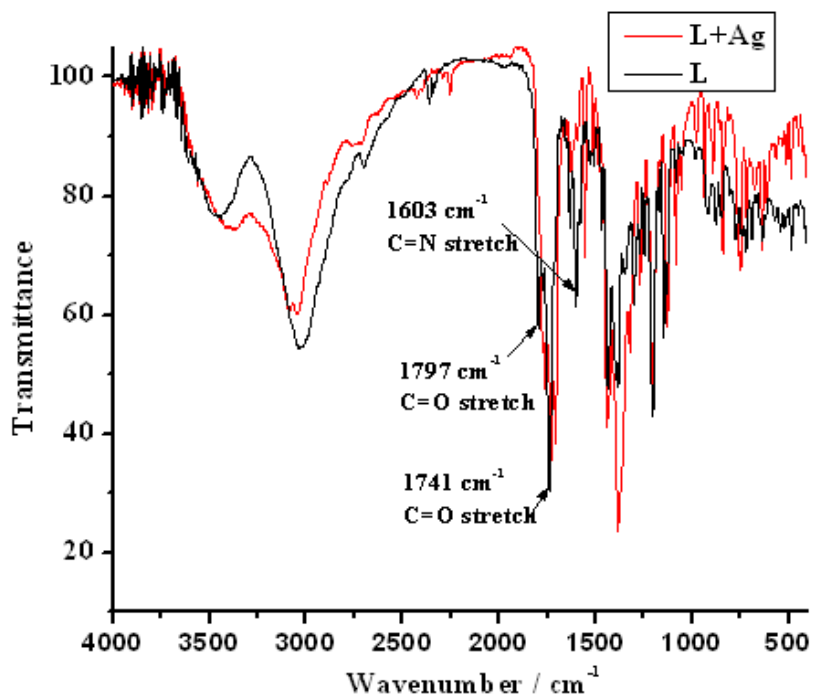

Fig. S1 IR spectra of L and L-Ag<sup>+</sup>.
